# Supplementary material
Source: PubMed Central journal article supplement (PMC4372897)
Supplement: NIHMS671031-supplement-eAppendix.pdf [file NIHMS671031-supplement-eAppendix.pdf]

## Supplementary Online Content

Makris UE, Abrams RC, Gurland B, Reid C. Management of persistent pain in the older patient. *JAMA*. doi:10.1001/jama.2014.9405.

### **eAppendix.** Search Strategy

This supplementary material has been provided by the authors to give readers additional information about their work.

## **eAppendix.** Search Strategy

**Search 1:** We specifically sought to identify studies of commonly administered pharmacologic and non-pharmacologic treatments that reported results relevant in the care of older adults. Findings from this review are reported in the text of the article in print.

**Search Strategy:** We searched MEDLINE and the Cochrane database from January 1, 1990 through May 31, 2014 using the terms *aged, older adults, elderly, chronic pain, persistent pain, pain management, intractable pain and refractory pain*. We limited the search to articles involving humans, those published in English, and to studies with a mean sample age of 60 years or greater or ones that reported age stratified results (i.e., for groups with a mean age above 60 years). Given the relative paucity of randomized controlled trials focusing on older adults with persistent pain, we also reviewed systematic reviews, published guidelines, and consensus statements.

MEDLINE Search Results:

1. Aged (MESH Term) (2310314 articles)
2. Term “older adults” appeared in citation title (13937 articles)
3. Term “older adults” appeared in citation abstract (26555 articles)
4. Term “elderly” appeared in citation title (76752 articles)
5. Term “elderly” appeared in citation abstract (129625 articles)
6. 1 or 2 or 3 or 4 or 5 (2342334 articles)
7. Chronic pain (MESH term) (3260 articles)
8. Pain management (MESH term) (17024 articles)

9. Intractable pain (MESH term) (5513 articles)
10. Term “refractory pain” appeared in abstract (255 articles)
11. Term “persistent pain” appeared in abstract (2735 articles)
12. 7 or 8 or 9 or 10 or 11 (27836 articles)
13. 6 and 12 (6153 articles)
14. Limit search to articles published from 1/1/1990 through 5/31/2014 (4920 articles)
15. Limit search to English language and humans (4325 articles)
16. Exclude duplicates (4283 articles)
17. Excluded based on review of the abstract or full manuscript.
  - Qualitative study (95)
  - Focus on cancer pain or pain at the end-of-life (695)
  - Epidemiologic study (669)
  - Focus on pain at time of (or after) surgery including anesthesia studies (567)
  - Interventional approaches to pain reduction (eg, nerve blocks, nerve stimulation) (493)
  - Focus on specific pain states (eg, dental pain, burn pain, rectal pain, facial pain) (324)
  - Health services research (210)
  - Non-systematic reviews (153)
  - Case reports (119)

- Focus on pain measurement to include pain assessment and instrument development (189)
- Basic pain research (154)
- Treatment study but with sample mean age less than 60 years (163)
- Focus on provider attitudes/beliefs or targeted educational intervention (64)
- Focus on use of imaging to diagnose and/or treat pain (96)
- Pain not focus of study (65)
- Focus on acute pain (83)
- Specific pain treatment focus (eg, botulinum toxin, laser therapy, ketamine, shock waves) (43)
- Did not report pain outcomes (20)

18. Number of articles following above reasons for exclusion (81)

19. Additional eligible publications found by review of Cochrane Database and search of reference lists (11)

20. Total number of articles included in review (92 articles)

## References Identified by Above Search

1. Abdulla A, Adams N, Bone M, et al. Guidance on the management of pain in older people. *Age Ageing*. 2013;42(Suppl 1):i1-57.
2. AGS Panel on Persistent Pain in Older Persons. Pharmacological management of persistent pain in older persons. An Update. *J Am Geriatr Soc*. 2009;57:1331-1346.
3. Ahn AC, Bennani T, Freeman R, Hamdy O, Kaptchuk TJ. Two styles of acupuncture for treating painful diabetic neuropathy--a pilot randomised control trial. *Acupunct Med*. 2007;25(12):11-17.
4. Baer PA, Thomas LM, Shainhouse Z. Treatment of osteoarthritis of the knee with a topical diclofenac solution: a randomized controlled, 6-week trial [ISRCTN53366886] *BMC Musculoskelet Disord*. 2005;6:44.
5. Baird CL, Sands L. A pilot study of the effectiveness of guided imagery with progressive muscle relaxation to reduce chronic pain and mobility difficulties of osteoarthritis. *Pain Manag Nurs*. 2004;5(3):97-104.
6. Barad A, Maimon Y, Miller E, et al. Acupuncture treatment in geriatric rehabilitation: a retrospective study. *J Acupunct Meridian Stud*. 2008;1(1):54-57.
7. Bartels EM, Lund H, Hagen KB, Dagfinrud H, Christensen R, Danneskiold-Samsøe B. Aquatic exercise for the treatment of knee and osteoarthritis. *Cochrane Database Syst Rev*. 2007:CD005523.
8. Barutell C, Camba A, González-Escalada JR, Rodriguez M. High dose transdermal buprenorphine for moderate to severe pain in Spanish pain centres--a retrospective multicenter safety and efficacy study. *Pain Pract*. 2008;8(5):355-361.
9. Bennell KL, Hunt MA, Wrigley TV, et al. Hip strengthening reduces symptoms but not knee load in people with medial knee osteoarthritis and varus malalignment: a randomised controlled trial. *Osteoarthritis Cartilage*. 2010;18(5):621-628.
10. Berger L, Klein C, Commandeur M. Evaluation of the immediate and midterm effects of mobilization in hot spa water on static and dynamic balance in elderly subjects. *Ann Readapt Med Phys*. 2008;51(2):84-95.
11. Berman BM, Lao L, Langenberg P, Lee WL, Gilpin AM, Hochberg MC. Effectiveness of acupuncture as adjunctive therapy in osteoarthritis of the knee: a randomized, controlled trial. *Ann Intern Med*. 2004;141(12):901-910.
12. Berman RL, Iris MA, Bode R, Drengenberg C. The effectiveness of an online mind-body intervention for older adults with chronic pain. *J Pain*. 2009;10(1):68-79.
13. Bezalel T, Carmeli E, Katz-Leurer M. The effect of a group education programme on pain and function through knowledge acquisition and home-based exercise among patients with knee osteoarthritis: a parallel randomised single-blind clinical trial. *Physiotherapy*. 2010;96(2):137-143.
14. Bjordal JM, Ljunggren AE, Lovning A, Slordal L. Non-steroidal anti-inflammatory drugs, including cyclo-oxygenase-2 inhibitors, in osteoarthritic knee pain: meta-analysis of randomized placebo controlled trials. *BMJ*. 2004;329(7478):1317.
15. Boyle J, Eriksson MEV, Gribble L, et al. Randomized, placebo-controlled comparison of amitriptyline, duloxetine, and pregabalin in patients with chronic diabetic peripheral neuropathic pain. *Diabetes Care*. 2012;35:2451-2458.
16. Burch F, Coddling C, Patel N, Sheldon E. Lidocaine patch 5% improves pain, stiffness, and physical function in osteoarthritis pain patients. *Osteoarthritis Cartilage*. 2004;12:253-255.
17. Chaparro LE, Furlan AD, Deshpande A, Mailis-Gagnon A, Atlas S, Turk DC. Opioids compared to placebo or other treatments for chronic low-back pain. *Cochrane Database Syst Rev*. 2013;8:CD004959. doi:10.1002/14651858.CD004959.pub4.

18. Chappell AS, Ossanna MJ, Liu-Seifert H, et al. Duloxetine, a centrally acting analgesic, in the treatment of patients with osteoarthritis knee pain: A 13-week, randomized, placebo-controlled trial. *Pain*. 2009;146:253-260.
19. Cheing GL, Hui-Chan CW, Chan KM. Does four weeks of TENS and/or isometric exercise produce cumulative reduction of osteoarthritic knee pain? *Clin Rehabil*. 2002;16(7):749-760.
20. Chodosh J, Morton SC, Mojica W, et al. Meta-analysis: Chronic disease self-management programs for older adults. *Ann Intern Med*. 2005;143:427-438.
21. Cook AJ. Cognitive-behavioral pain management for elderly nursing home residents. *J Gerontol B Psychol Sci Soc Sci*. 1998;53(1):51-59.
22. Couilliot MF, Darees V, Delahaye G, et al. Acceptability of an acupuncture intervention for geriatric chronic pain: an open pilot study. *J Integr Med*. 2013;11(1):26-31.
23. Davis GC, White TL. A goal attainment pain management program for older adults with arthritis. *Pain Manag Nurs*. 2008;9(4):171-179.
24. Decker S, Wardell DW, Cron SG. Using a healing touch intervention in older adults with persistent pain: a feasibility study. *J Holist Nurs*. 2012;30(3):205-213.
25. Denegar CR, Dougherty DR, Friedman JE, et al. Preferences for heat, cold, or contrast in patients with knee osteoarthritis affect treatment response. *Clin Interv Aging*. 2010;5:199-206.
26. Derry S, Moore RA, Rabbie R. Topical NSAIDs for chronic musculoskeletal pain in adults. *Cochrane Database Syst Rev*. 2012;(9):CD007400. doi:10.1002/14651858.CD007400.pub2.
27. Eccleston C, Fisher E, Craig L, Duggan GB, Rosser BA, Keogh E. Psychological therapies (Internet-delivered) for the management of chronic pain in adults. *Cochrane Database Syst Rev*. 2014;2:CD010152. doi:10.1002/14651858.CD010152.pub2.
28. Ersek M, Turner JA, McCurry SM, Gibbons L, Miller-Kraybill B. Efficacy of a self-management group intervention for elderly persons with chronic pain. *Clin J Pain*. 2003;19(3):156-167.
29. Fine PG. Treatment guidelines for the pharmacological management of pain in older persons. *Pain Med*. 2012;13:S57-S66.
30. Fioravanti A, Giannitti C, Bellisai B, Iacopini F, Galeazzi M. Efficacy of balneotherapy on pain, function and quality of life in patients with osteoarthritis of the knee. *Int J Biometeorol*. 2012;56(4):583-590.
31. Focht BC. Effectiveness of exercise interventions in reducing pain symptoms among older adults with knee osteoarthritis: A review. *J Aging Phys Act*. 2006;14:212-235.
32. Frakes EP, Risser RC, Ball TD, Hochberg MC, Wohlreich MM. Duloxetine added to oral nonsteroidal anti-inflammatory drugs for treatment of knee pain due to osteoarthritis: results of a randomized, double-blind, placebo-controlled trial. *Curr Med Res Opin*. 2011;27(12):2361-2372.
33. Fransen M, McConnell S, Hernandez-Molina G, Reichenbach S. Exercise for osteoarthritis of the hip. *Cochrane Database Syst Rev*. 2009;(3):CD007912. doi:10.1002/14651858.CD007912.
34. Fransen M, McConnell S. Exercise for osteoarthritis of the knee. *Cochrane Database Syst Rev*. 2008;(4):CD004376. doi:10.1002/14651858.CD004376.pub2.
35. Gay MC, Philippot P, Luminet O. Differential effectiveness of psychological interventions for reducing osteoarthritis pain: a comparison of Erikson [correction of Erickson] hypnosis and Jacobson relaxation. *Eur J Pain*. 2002;6(1):1-16.
36. Goldstein DJ, Lu Y, Detke MJ, Lee TC, Iyengar S. Duloxetine vs. placebo in patients with painful diabetic neuropathy. *Pain*. 2005;116:109-118.
37. Hassan BS, Mockett S, Doherty M. Influence of elastic bandage on knee pain, proprioception, and postural sway in subjects with knee osteoarthritis. *Ann Rheum Dis*. 2002;61(1):24-28.
38. Hermanns K, Junker U, Nolte T. Prolonged-release oxycodone/naloxone in the treatment of neuropathic pain - results from a large observational study. *Expert Opin Pharmacother*.

- 2012;13(3):299-311.
39. Hinman RS, Bennell KL, Crossley KM, McConnell J. Immediate effects of adhesive tape on pain and disability in individuals with knee osteoarthritis. *Rheumatology (Oxford)*. 2003;42(7):865-869.
  40. Hochberg MC, Wohlreich M, Gaynor P, Hannah S, Risser R. Clinically relevant outcomes based on analysis of pooled data from 2 trials of duloxetine in patients with knee osteoarthritis. *J Rheumatol*. 2012;39(2):352-358.
  41. Huang MH, Yang RC, Lee CL, Chen TW, Wang MC. Preliminary results of integrated therapy for patients with knee osteoarthritis. *Arthritis Rheum*. 2005;53(6):812-820.
  42. Kang JW, Lee MS, Posadzki P, Ernst T. Tai chi for the treatment of osteoarthritis: a systematic review and meta-analysis. *BMJ Open*. 2011;1(1):e000035. doi:10.1136/bmjopen-2010-000035.
  43. Konishi I, Tanabe N, Seki N, et al. Physiotherapy program through home visits for community-dwelling elderly Japanese women with mild knee pain. *Tohoku J Exp Med*. 2009;219(2):91-99.
  44. Kroon FP, van der Burg LR, Buchbinder R, Osborne RH, Johnston RV, Pitt V. Self-management education programmes for osteoarthritis. *Cochrane Database Syst Rev*. 2014;1:CD008963. doi:10.1002/14651858.CD008963.pub2.
  45. Larson AM, Polson J, Fontana RJ, et al. Acetaminophen-induced acute liver failure: Results of a United States multicenter, prospective study. *Hepatology*. 2005;42(6):1364-1372.
  46. Lee CY, Cho YH. Evaluation of a community health practitioner self-care program for rural Korean patients with osteoarthritis. *J Korean Acad Nurs*. 2012;42(7):965-973.
  47. Lee MS, Jang JW, Jang HS, Moon SR. Effects of Qi-therapy on blood pressure, pain and psychological symptoms in the elderly: a randomized controlled pilot trial. *Complement Ther Med*. 2003;11(3):159-164.
  48. Levy SS, Macera CA, Hootman JM, et al. Evaluation of a multi-component group exercise for adults with arthritis: Fitness and Exercise for People with Arthritis (FEPA). *Dis Health J*. 2012;5:305-311.
  49. Lubis DU, Jaya ES, Arjadi R, Hanum L, Astri K, Putri MD. Preliminary study on the effectiveness of short group cognitive behavioral therapy (GCBT) on Indonesian older adults. *PLoS One*. 2013;8(2):e57198.
  50. Lunde LH, Nordhus IH, Pallesen S. The effectiveness of cognitive and behavioral treatment of chronic pain in the elderly: A quantitative review. *J Clin Psychol Med Settings*. 2009;16:254-262.
  51. Mahboob N, Sousan K, Shirzad A, et al. The efficacy of a topical gel prepared using Lake Urmia mud in patients with knee osteoarthritis. *J Altern Complement Med*. 2009;15(11):1239-1242.
  52. Makris UE, Kohler MJ, Fraenkel L. Adverse effects of topical nonsteroidal antiinflammatory drugs in older adults with osteoarthritis: a systematic literature review. *J Rheumatol*. 2010;37(6):1236-1243.
  53. Malonne H, Coffiner M, Fontaine D, et al. Long-term tolerability of tramadol LP, a new once-daily formulation, in patients with osteoarthritis or low back pain. *J Clin Pharm Ther*. 2005;30(2):113-120.
  54. Malonne H, Coffiner M, Sonet B et al. Efficacy and tolerability of sustained-release tramadol in the treatment of symptomatic osteoarthritis of the hip or knee: a multicenter, randomized, double-blind, placebo-controlled study. *Clin Ther* 2004;26:1774-1782.
  55. Manheimer E, Cheng K, Linde K, et al. Acupuncture for peripheral joint osteoarthritis. *Cochrane Database Syst Rev*. 2010;(1):CD001977. doi:10.1002/14651858.CD001977.pub2.
  56. Manheimer E, Linde K, Lao L, Bouter AM, Berman BM. Meta-analysis: Acupuncture for osteoarthritis of the knee. *Ann Intern Med*. 2007;146:868-878.
  57. McCracken LM, Jones R. Treatment for chronic pain for adults in the seventh and eighth decades of life: a preliminary study of Acceptance and Commitment Therapy (ACT). *Pain Med*.

2012;13(7):860-867.

58. Michalsen A, Moebus S, Spahn G, Esch T, Langhorst J, Dobos GJ. Leech therapy for symptomatic treatment of knee osteoarthritis: results and implications of a pilot study. *Altern Ther Health Med*. 2002;8(5):84-88.
59. Moore RA, Straube S, Wiffen PJ, Derry S, McQuay HJ. Pregabalin for acute and chronic pain in adults. *Cochrane Database Syst Rev*. 2009;(3):CD007076. doi:10.1002/14651858.CD007076.pub2.
60. Morello CM, Leckband SG, Stoner CP, Moorhouse DF, Sahagian GA. Randomized double-blind study comparing the efficacy of gabapentin with amitriptyline on diabetic peripheral neuropathy pain. *Arch Intern Med*. 1999;159:1931-1937.
61. Morone NE, Greco CM. Mind-body interventions for chronic pain in older adults: a structured review. *Pain Med*. 2007;8(4):359-375.
62. Morone NE, Rollman BL, Moore CG, Qin L, Weiner DK. A mind-body program for older adults with chronic low back pain: Results of a pilot study. *Pain Med*. 2009;8:1395-1407.
63. Ng MM, Leung MC, Poon DM. The effects of electro-acupuncture and transcutaneous electrical nerve stimulation on patients with painful osteoarthritic knees: a randomized controlled trial with follow-up evaluation. *J Altern Complement Med*. 2003;9(5):641-649.
64. Nüesch E, Rutjes AW, Husni E, Welch V, Jüni P. Oral or transdermal opioids for osteoarthritis of the knee or hip. *Cochrane Database Syst Rev*. 2009;(4):CD003115. doi:10.1002/14651858.CD003115.pub3.
65. Papaleontiou M, Olkhovskaya Y, Moore AA, et al. Outcomes associated with opioid use in the treatment of chronic non-malignant pain among older persons. *J Am Geriatr Soc*. 2010;58(7):1353-1369.
66. Park J, McCaffrey R, Dunn D, Goodman R. Managing osteoarthritis. Comparisons of chair yoga, Reiki, and education (pilot study). *Holist Nurs Pract*. 2011;25:316-326.
67. Parker SJ, Vasquez R, Chen EK, et al. A comparison of the arthritis foundation self-help program across three race/ethnicity groups. *Ethn Dis*. 2011;21(4):444-450.
68. Perlman AI, Sabina A, Williams AI, Njike VY, Katz DL. Massage therapy for osteoarthritis of the knee A randomized controlled trial. *Arch Intern Med*. 2006;166:2533-2538.
69. Pisters MF, Veenhof C, Schellevis FG, Twisk JW, Dekker J, De Bakker DH. Exercise adherence improving long-term patient outcome in patients with osteoarthritis of the hip and/or knee. *Arthritis Care Res (Hoboken)*. 2010;62(8):1087-1094.
70. Randall C, Dickens A, White A, Sanders H, Fox M, Campbell J. Nettle sting for chronic knee pain: a randomised controlled pilot study. *Complement Ther Med*. 2008;16(2):66-72.
71. Reid MC, Henderson CR, Jr., Papaleontiou M, et al. Characteristics of older adults receiving opioids in primary care: treatment duration and outcomes. *Pain Med*. 2010;11(7):1063-1071.
72. Saunders KW, Dunn KM, Merrill JO, et al. Relationship of opioid use and dosage levels to fractures in older chronic pain patients. *J Gen Intern Med*. 2010;25(4):310-315.
73. Simmons SF, Ferrell BA, Schnelle JF. Effects of a controlled exercise trial on pain in nursing home residents. *Clin J Pain*. 2002;18(6):380-385.
74. Singh BB, Berman BM, Hadhazy V, et al. Clinical decisions in the use of acupuncture as an adjunctive therapy for osteoarthritis of the knee. *Altern Ther Health Med*. 2001;7(4):58-65.
75. Solomon DH, Rassen JA, Glynn RJ, Lee J, Levin R, Schneeweiss S. The comparative safety of analgesics in older adults with arthritis. *Arch Intern Med*. 2010;170(22):1968-1978.
76. Solomon DH, Warsi A, Brown-Stevenson T, et al. Does self-management education benefit all populations with arthritis? A randomized controlled trial in a primary care physician network. *J Rheumatol*. 2002;29(2):362-368.
77. Stener-Victorin E, Kruse-Smidje C, Jung K. Comparison between electro-acupuncture and



- hydrotherapy, both in combination with patient education and patient education alone, on the symptomatic treatment of osteoarthritis of the hip. *Clin J Pain*. 2004;20(3):179-185.
78. Stepanovic A, Pirc J, Lahajnar-Cavlovic S. Clinical efficacy of OROS hydromorphone in patients suffering from severe chronic pain: A study undertaken in routine clinical practice. *Wien Klin Wochenschr*. 2011;123(17-18):531-535.
  79. Teixeira E. The effect of mindfulness meditation on painful diabetic peripheral neuropathy in adults older than 50 years. *Holist Nurs Pract*. 2010;24(5):277-283.
  80. Towheed T, Maxwell L, Judd M, Catton M, Hochberg MC, Wells GA. Acetaminophen for osteoarthritis. *Cochrane Database Syst Rev*. 2006(1):CD004257.
  81. Tse MM, Vong SK, Ho SS. The effectiveness of an integrated pain management program for older persons and staff in nursing homes. *Arch Gerontol Geriatr*. 2012;54(2):e203-212.
  82. Tseng CN, Chen CC, Wu SC, Lin LC. Effects of a range-of-motion exercise programme. *J Adv Nurs*. 2007;57(2):181-191.
  83. Tukmachi E, Jubb R, Dempsey E, Jones P. The effect of acupuncture on the symptoms of knee osteoarthritis--an open randomised controlled study. *Acupunct Med*. 2004;22(1):14-22.
  84. Uberall MA, Müller-Schwefe GH. Low-dose 7-day transdermal buprenorphine in daily clinical practice - perceptions of elderly patients with moderate non-malignant chronic pain. *Curr Med Res Opin*. 2012;28(10):1585-1595.
  85. Underwood M, Ashby D, Cross P, et al. Advice to use topical or oral ibuprofen for chronic knee pain in older people: randomized controlled trial and patient preference study. *BMJ*. 2008;336(7636):138-142.
  86. Veenhof C, Köke AJ, Dekker J, et al. Effectiveness of behavioral graded activity in patients with osteoarthritis of the hip and/or knee: A randomized clinical trial. *Arthritis Rheum*. 2006;55(6):925-934.
  87. Vorsanger G, Xiang J, Jordan D et al. Post hoc analysis of a randomized, double-blind, placebo-controlled efficacy and tolerability study of tramadol extended release for the treatment of osteoarthritis pain in geriatric patients. *Clin Ther* 2007;29:2520-2535.
  88. Wang C, Schmid CH, Hibberd PL, et al. Tai Chi is effective in treating knee osteoarthritis: a randomized controlled trial. *Arthritis Rheum*. 2009;61(11):1545-1553.
  89. Yang KH, Kim YH, Lee MS. Efficacy of Qi-therapy (external Qigong) for elderly people with chronic pain. *Int J Neurosci*. 2005;115(7):949-963.
  90. Yao P, Meng LX, Ma JM, et al. Sustained-release oxycodone tablets for moderate to severe painful diabetic peripheral neuropathy: a multicenter, open-labeled, postmarketing clinical observation. *Pain Med*. 2012;13(1):107-114.
  91. Zautra AJ, Smith BW. Impact of controlled-release oxycodone on efficacy beliefs and coping efforts among osteoarthritis patients with moderate to severe pain. *Clin J Pain*. 2005;21(6):471-477.
  92. Zhang W, Jones A, Doherty M. Does paracetamol (acetaminophen) reduce the pain of osteoarthritis? A meta-analysis of randomized controlled trial. *Ann Rheum Dis*. 2004;63:901-907.

Persistent pain is common and frequently disabling in later life. It is most often due to musculoskeletal causes, usually involves multiple sites and rarely occurs in the absence of other medical conditions. Untreated or undertreated pain can lead to poor quality of life,

disability, depression, decreased socialization, as well as falls, and impaired sleep. Older patients who report experiencing pain should be routinely assessed for its impact on quality of life, mood and functioning.

As a first step, the physician and the patient should reach an agreement regarding realistic goals and expectations and where they overlap and diverge. For example, reduction in pain severity or frequency, improvement in activities of daily living, and maintenance of the patient's independence are likely to be agreed-upon goals. To remain realistic and relevant, goals often have to be refined at various points throughout the course of treatment.

Physician-patient agreement on specific therapeutic approaches is also necessary. Since later-life pain is often caused by multiple factors and conditions, the combination of drug and non-drug therapies is strongly recommended. Non-drug therapies may be used to relieve the emotional and cognitive burdens of persistent pain; these include supportive psychotherapy, cognitive behavioral psychotherapy, or problem-solving therapy. Rehabilitation therapies (eg, exercises supervised by a physical therapist or physical activity at home to improve strength) constitute critically important components of the management plan. If appropriate, home health aides and family members may also help the patient to keep up with exercises between therapy sessions. Increasing opportunities for social interaction and distraction from the pain itself are other non-drug approaches that should be strongly considered.

In combination with non-drug approaches, developing a medication regimen that is tolerable and effective is critical. Often the pharmacologic regimen involves a combination of drugs, introduced in a step-wise manner, starting with acetaminophen, then non-steroidal anti-inflammatory agents (NSAIDs), tramadol and opioids. However, bleeding and gastrointestinal side effects are not uncommon with NSAIDs; and fatigue, dizziness,

confusion, and falls can occur with opioid treatment. Antidepressants when added to the regimen may not only improve mood, sleep and energy but can also provide additional analgesic relief, as can anti-epileptic and mood-stabilizing drugs. Having a “rescue” medication for when the pain becomes especially intense or difficult to bear, is an important component of the overall pharmacologic strategy. The patient should understand, even if he or she is skeptical, that analgesic medications that were ineffective in the past, may be helpful now when employed in combination with other drugs or therapies.

At the heart of any successful long-term management plan is a positive doctor-patient relationship. The physician must be accessible, informed, and able to communicate with the patient about the various drug and non-drug therapies, and their risks and potential benefits. In turn, the patient should adhere to agreed-upon therapies and communicate outcomes and tolerability. Cultivating an enduring, trusting relationship, where mutual treatment goals are established, may be one of the most rewarding aspects of delivering (for the physician) and receiving (for the patient) pain care over time.
